# Supplementary material
Source: publisher figshare collection journal article supplement (https://frontiersin.figshare.com/ndownloader/files/22186536)
Supplement: Supplementary file [file 22186536]

**Supplementary Figure 1.**

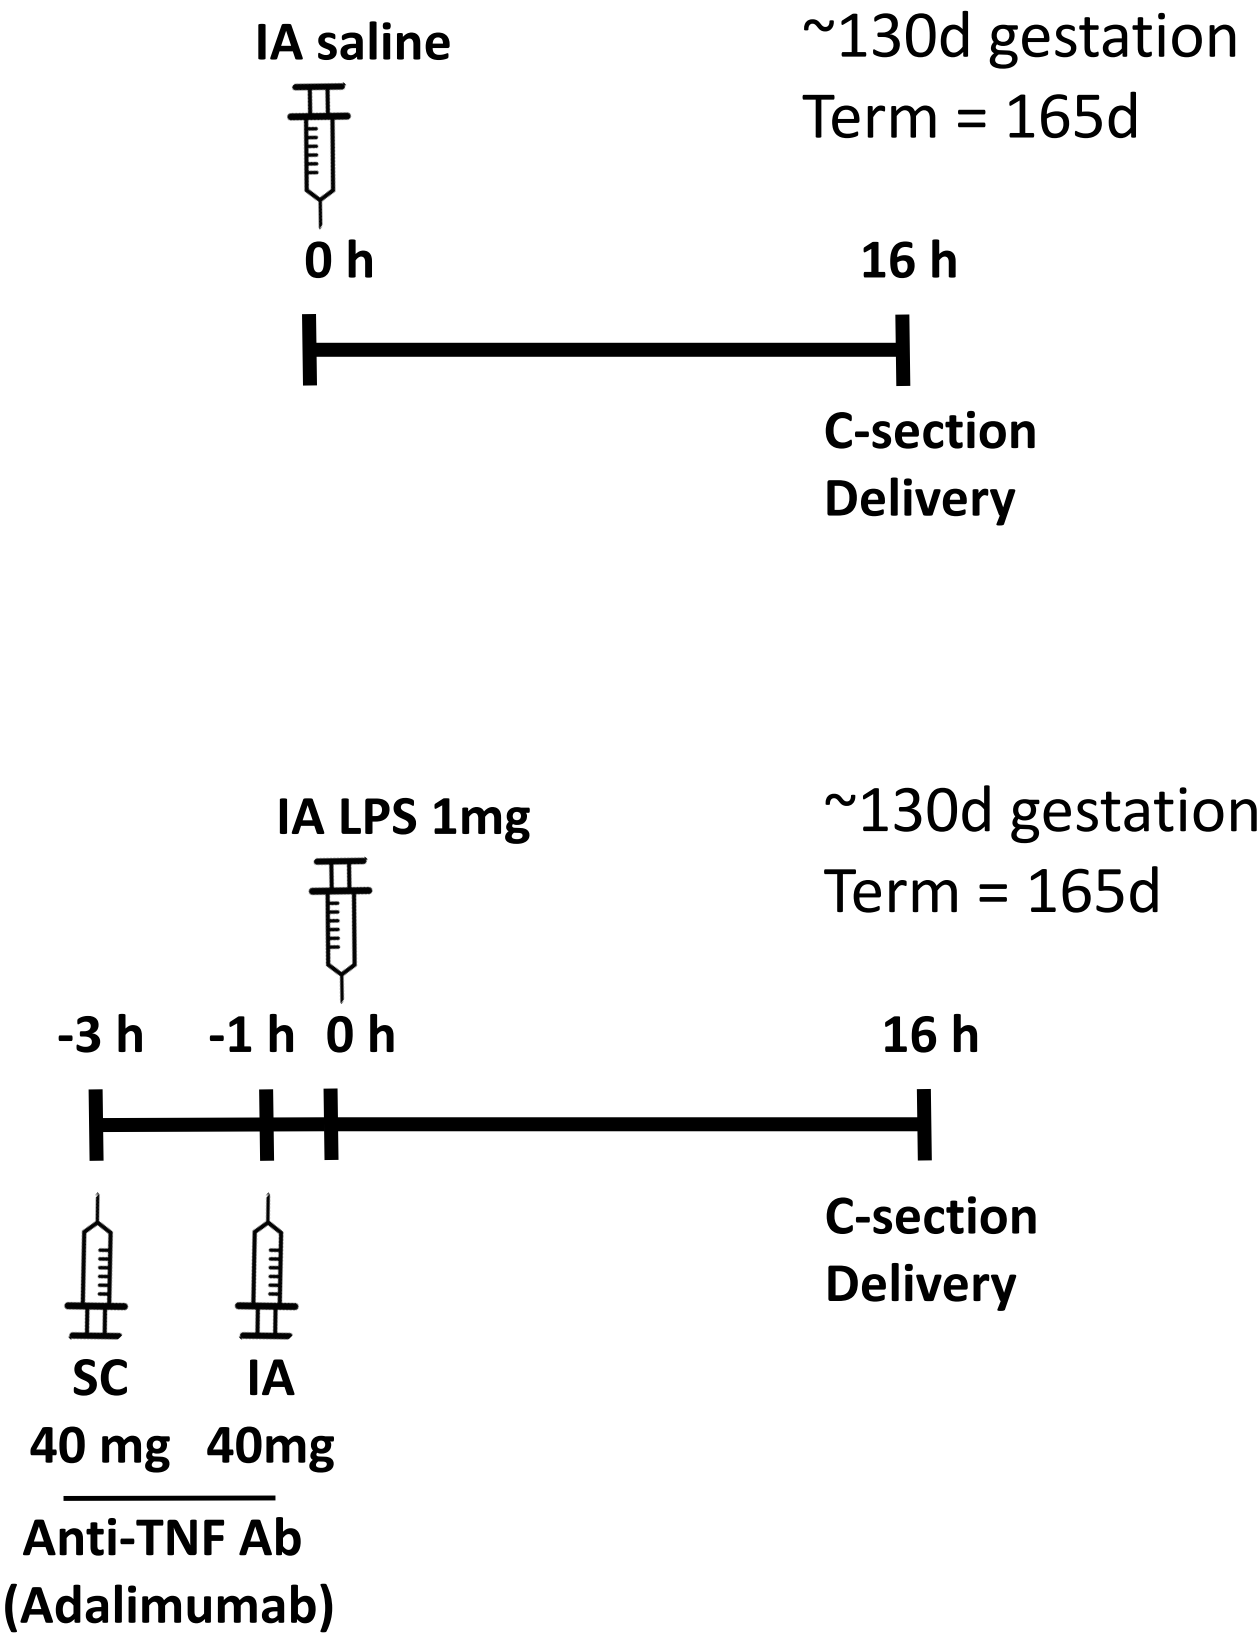

**Supplementary Figure 1.** Experimental design of saline and Adalimumab treatment in LPS-exposed animals.
